# Supplementary material for: Initial Blood pH, Lactate and Base Deficit Add No Value to Peri-Arrest Factors in Prognostication of Neurological Outcome After Out-of-Hospital Cardiac Arrest
Source: PubMed Central journal article supplement (PMC8483260; doi:10.3389/fmed.2021.697906), 2021-09-16

**Missing pattern figure, missing values map:**

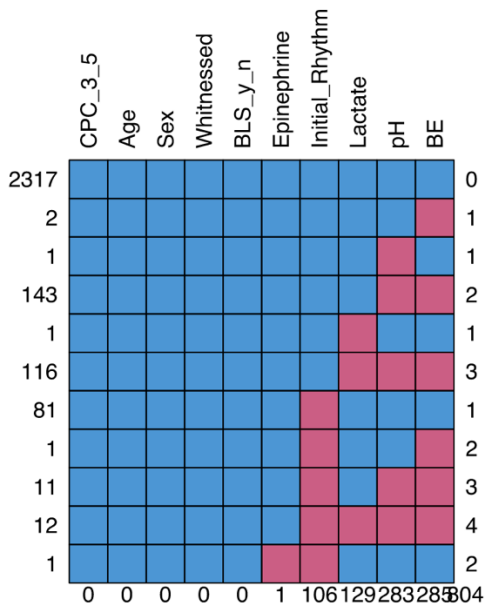

**Missing values map**

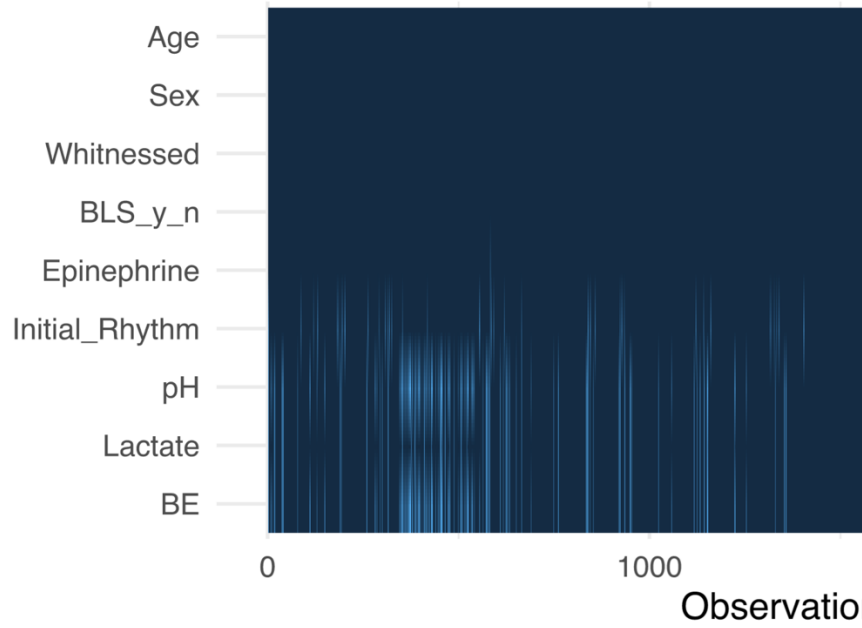

**Models:**

**Model 1**

| overall<br>(n=2317) | OHCA |        |                       |       | IHCA           |        |                       |       |       |                |                       |       |       |        |
|---------------------|------|--------|-----------------------|-------|----------------|--------|-----------------------|-------|-------|----------------|-----------------------|-------|-------|--------|
|                     | Sig. | Exp(B) | 99% C.I.for<br>EXP(B) |       | Sig.           | Exp(B) | 99% C.I.for<br>EXP(B) |       | Sig.  | Exp(B)         | 99% C.I.for<br>EXP(B) |       |       |        |
| Age                 | .000 | 1.028  | 1.021                 | 1.034 | Age            | .000   | 1.031                 | 1.021 | 1.041 | Age            | .001                  | 1.022 | 1.005 | 1.041  |
| Sex                 | .131 | 1.182  | .952                  | 1.468 | Sex            | .080   | 1.258                 | .898  | 1.762 | Sex            | .972                  | .993  | .573  | 1.720  |
| Witness status      | .000 | 1.825  | 1.341                 | 2.483 | Witness status | .000   | 1.839                 | 1.191 | 2.839 | Witness status | .902                  | 1.066 | .277  | 4.108  |
| BLS                 | .000 | 2.189  | 1.705                 | 2.809 | BLS            | .000   | 2.042                 | 1.447 | 2.881 | BLS            | .146                  | 3.536 | .378  | 33.093 |
| Initial Rhythm      | .000 | 3.466  | 2.846                 | 4.220 | Initial Rhythm | .000   | 4.007                 | 2.935 | 5.471 | Initial Rhythm | .000                  | 2.953 | 1.684 | 5.179  |
| Adrenaline          | .000 | 1.464  | 1.391                 | 1.540 | Adrenaline     | .000   | 1.492                 | 1.384 | 1.609 | Adrenaline     | .000                  | 1.315 | 1.130 | 1.530  |
| Constant            | .000 |        |                       |       | Constant       | .000   |                       |       |       | Constant       | .000                  |       |       |        |

**Model 2**

| overall<br>(n=2317) | OHCA |        |                       |       | IHCA           |        |                       |       |       |                |                       |       |       |        |
|---------------------|------|--------|-----------------------|-------|----------------|--------|-----------------------|-------|-------|----------------|-----------------------|-------|-------|--------|
|                     | Sig. | Exp(B) | 99% C.I.for<br>EXP(B) |       | Sig.           | Exp(B) | 99% C.I.for<br>EXP(B) |       | Sig.  | Exp(B)         | 99% C.I.for<br>EXP(B) |       |       |        |
| Age                 | .000 | 1.033  | 1.024                 | 1.042 | Age            | .000   | 1.036                 | 1.026 | 1.047 | Age            | .001                  | 1.026 | 1.007 | 1.046  |
| Sex                 | .235 | 1.145  | .853                  | 1.538 | Sex            | .101   | 1.248                 | .881  | 1.766 | Sex            | .570                  | .880  | .494  | 1.569  |
| Witnessed           | .001 | 1.729  | 1.143                 | 2.616 | Witnessed      | .001   | 1.782                 | 1.145 | 2.775 | Witnessed      | .961                  | .974  | .241  | 3.939  |
| BLS                 | .000 | 2.127  | 1.522                 | 2.972 | BLS            | .000   | 2.040                 | 1.437 | 2.897 | BLS            | .130                  | 3.721 | .397  | 34.860 |
| Initial Rhythm      | .000 | 2.804  | 2.132                 | 3.688 | Initial Rhythm | .000   | 3.190                 | 2.294 | 4.435 | Initial Rhythm | .001                  | 2.163 | 1.176 | 3.977  |
| Adrenaline          | .000 | 1.307  | 1.218                 | 1.402 | Adrenaline     | .000   | 1.345                 | 1.242 | 1.457 | Adrenaline     | .017                  | 1.160 | .988  | 1.361  |
| pH                  | .264 | .563   | .150                  | 2.115 | pH             | .574   | .702                  | .139  | 3.544 | pH             | .187                  | .293  | .027  | 3.220  |
| Lactate             | .002 | 1.064  | 1.010                 | 1.120 | Lactate        | .009   | 1.065                 | 1.001 | 1.134 | Lactate        | .064                  | 1.068 | .974  | 1.171  |
| BE                  | .018 | .966   | .930                  | 1.003 | BE             | .103   | .970                  | .925  | 1.018 | BE             | .097                  | .960  | .902  | 1.023  |
| Constant            | .916 |        |                       |       | Constant       | .761   |                       |       |       | Constant       | .391                  |       |       |        |

| Model 3        | overall<br>(n=2317) | 99% C.I.for<br>EXP(B) |        |       |       | OHCA  | 99% C.I.for<br>EXP(B) |        |       |       | IHCA  | 99% C.I.for<br>EXP(B) |        |       |       |       |
|----------------|---------------------|-----------------------|--------|-------|-------|-------|-----------------------|--------|-------|-------|-------|-----------------------|--------|-------|-------|-------|
|                |                     | Sig.                  | Exp(B) |       |       |       | Sig.                  | Exp(B) |       |       |       | Sig.                  | Exp(B) |       |       |       |
| <b>pH</b>      | <b>Overall</b>      | pH                    | .001   | .223  | .090  | .551  | pH                    | .023   | .284  | .068  | 1188  | pH                    | .013   | .125  | .015  | 1068  |
|                |                     | Lactate               | .000   | 1.116 | 1.077 | 1.157 | Lactate               | .000   | 1.133 | 1.070 | 1.199 | Lactate               | .019   | 1.082 | .992  | 1.180 |
|                |                     | BE                    | .012   | .967  | .942  | .993  | BE                    | .065   | .970  | .930  | 1.012 | BE                    | .083   | .961  | .906  | 1.020 |
|                |                     | Constant              | .004   |       |       |       | Constant              | .049   |       |       |       | Constant              | .020   |       |       |       |
| <b>Lactate</b> | <b>Overall</b>      | pH                    | .000   | .012  | .006  | .024  | pH                    | .000   | .011  | .005  | .026  | pH                    | .000   | .013  | .003  | .060  |
|                |                     | Constant              | .000   |       |       |       | Constant              | .000   |       |       |       | Constant              | .000   |       |       |       |
| <b>BE</b>      | <b>Overall</b>      | Lactate               | .000   | 1.213 | 1.176 | 1.250 | Lactate               | .000   | 1.218 | 1.177 | 1.262 | Lactate               | .000   | 1.194 | 1.119 | 1.275 |
|                |                     | Constant              | .000   |       |       |       | Constant              | .000   |       |       |       | Constant              | .000   |       |       |       |
| <b>BE</b>      | <b>Overall</b>      | BE                    | .000   | .884  | .867  | .902  | BE                    | .000   | .881  | .861  | .902  | BE                    | .000   | .894  | .860  | .930  |
|                |                     | Constant              | .000   |       |       |       | Constant              | .000   |       |       |       | Constant              | .000   |       |       |       |

**Variance inflation factor (VIF) values:**

**Variance Inflation Factor (VIF)**

|                | overall  |          | OHCA     |          | IHCA     |          |
|----------------|----------|----------|----------|----------|----------|----------|
|                | Model 1  | Model 2  | Model 1  | Model 2  | Model 1  | Model 2  |
| Age            | 1,033275 | 1,088946 | 1,040486 | 1,091617 | 1,040486 | 1,091617 |
| Sex            | 1,026764 | 1,037321 | 1,035962 | 1,053828 | 1,035962 | 1,053828 |
| Whitnessed     | 1,055741 | 1,053022 | 1,052662 | 1,049571 | 1,052662 | 1,049571 |
| BLS            | 1,04622  | 1,045688 | 1,032545 | 1,033724 | 1,032545 | 1,033724 |
| Epinephrine    | 1,016245 | 1,202335 | 1,015359 | 1,211541 | 1,015359 | 1,211541 |
| Initial Rhythm | 1,032581 | 1,101646 | 1,062224 | 1,142134 | 1,062224 | 1,142134 |
| Lactate        |          | 2,724514 |          | 3,080838 |          | 3,080838 |
| pH             |          | 2,930246 |          | 3,233254 |          | 3,233254 |
| BE             |          | 3,21605  |          | 3,716224 |          | 3,716224 |
| Maximum        | 3,716224 |          |          |          |          |          |

## Multiple imputations:

### Significant codes:

\*\*\* = 0.001

\*\* = 0.01

\* = 0.05

#### IHCA, Model 1

**1**

| Coefficients:  | Estimate  | Std,     | Error  | z        | value |
|----------------|-----------|----------|--------|----------|-------|
| (Intercept)    | -3,338896 | 0,47676  | -7,003 | 2,50E-12 | ***   |
| Age            | 0,027011  | 0,006603 | 4,091  | 4,30E-05 | ***   |
| Sex            | 0,083878  | 0,198541 | 0,422  | 0,673    |       |
| Witnessed      | 0,378068  | 0,468933 | 0,806  | 0,42     |       |
| BLS_y_n        | 0,909376  | 0,709122 | 1,282  | 0,2      |       |
| Epinephrine    | 0,340697  | 0,057453 | 5,93   | 3,03E-09 | ***   |
| Initial_Rhythm | 1,426981  | 0,209415 | 6,814  | 9,48E-12 | ***   |

#### IHCA, Model 1, mean

| Coefficients:  | Estimate    | z        | value |
|----------------|-------------|----------|-------|
| (Intercept)    | -2,80976383 | 1,75E-12 | ***   |
| Age            | 0,02291117  | 2,91E-05 | ***   |
| Sex            | 0,06979167  | 5,62E-01 |       |
| Witnessed      | 0,26337333  | 4,17E-01 |       |
| BLS_y_n        | 0,77942483  | 1,55E-01 |       |
| Epinephrine    | 0,28587217  | 2,13E-09 | ***   |
| Initial_Rhythm | 1,1449036   | 9,36E-12 | ***   |

**2**

| Coefficients:  | Estimate  | Std,     | Error  | z        | value |
|----------------|-----------|----------|--------|----------|-------|
| (Intercept)    | -3,381631 | 0,479801 | -7,048 | 1,82E-12 | ***   |
| Age            | 0,027716  | 0,006629 | 4,181  | 2,90E-05 | ***   |
| Sex            | 0,059395  | 0,198802 | 0,299  | 0,765    |       |
| Witnessed      | 0,303895  | 0,468232 | 0,649  | 0,516    |       |
| BLS_y_n        | 0,939914  | 0,707689 | 1,328  | 0,184    |       |
| Epinephrine    | 0,343689  | 0,057504 | 5,977  | 2,28E-09 | ***   |
| Initial_Rhythm | 1,432547  | 0,209855 | 6,826  | 8,71E-12 | ***   |

**3**

| <b>Coefficients:</b> | <b>Estimate</b> | <b>Std,</b> | <b>Error</b> | <b>z</b> | <b>value</b> |
|----------------------|-----------------|-------------|--------------|----------|--------------|
| (Intercept)          | -3,416447       | 0,481929    | -7,089       | 1,35E-12 | ***          |
| Age                  | 0,028138        | 0,006636    | 4,24         | 2,23E-05 | ***          |
| Sex                  | 0,082989        | 0,19873     | 0,418        | 0,676    |              |
| Witnessed            | 0,304684        | 0,468144    | 0,651        | 0,515    |              |
| BLS_y_n              | 0,942231        | 0,707559    | 1,332        | 0,183    |              |
| Epinephrine          | 0,341299        | 0,057395    | 5,946        | 2,74E-09 | ***          |
| Initial_Rhythm       | 1,460875        | 0,209644    | 6,968        | 3,21E-12 | ***          |

**4**

| <b>Coefficients:</b> | <b>Estimate</b> | <b>Std,</b> | <b>Error</b> | <b>z</b> | <b>value</b> |
|----------------------|-----------------|-------------|--------------|----------|--------------|
| (Intercept)          | -3,373397       | 0,480429    | -7,022       | 2,19E-12 | ***          |
| Age                  | 0,027065        | 0,006654    | 4,067        | 4,76E-05 | ***          |
| Sex                  | 0,101413        | 0,199711    | 0,508        | 0,612    |              |
| Witnessed            | 0,290584        | 0,468755    | 0,62         | 0,535    |              |
| BLS_y_n              | 0,962479        | 0,708625    | 1,358        | 0,174    |              |
| Epinephrine          | 0,340268        | 0,05749     | 5,919        | 3,24E-09 | ***          |
| Initial_Rhythm       | 1,482003        | 0,209292    | 7,081        | 1,43E-12 | ***          |

**5**

| <b>Coefficients:</b> | <b>Estimate</b> | <b>Std,</b> | <b>Error</b> | <b>z</b> | <b>value</b> |
|----------------------|-----------------|-------------|--------------|----------|--------------|
| (Intercept)          | -3,348212       | 0,478585    | -6,996       | 2,63E-12 | ***          |
| Age                  | 0,027537        | 0,006626    | 4,156        | 3,24E-05 | ***          |
| Sex                  | 0,091075        | 0,198343    | 0,459        | 0,646    |              |
| Witnessed            | 0,303009        | 0,466357    | 0,65         | 0,516    |              |
| BLS_y_n              | 0,922549        | 0,705658    | 1,307        | 0,191    |              |
| Epinephrine          | 0,34928         | 0,057767    | 6,046        | 1,48E-09 | ***          |
| Initial_Rhythm       | 1,382987        | 0,207621    | 6,661        | 2,72E-11 | ***          |

**IHCA, Model 2**
**1**

| Coefficients:  | Estimate  | Std,     | Error  | z        | value |
|----------------|-----------|----------|--------|----------|-------|
| (Intercept)    | 1,431594  | 6,616048 | 0,216  | 0,82869  |       |
| Age            | 0,032362  | 0,00714  | 4,533  | 5,83E-06 | ***   |
| Sex            | -0,002191 | 0,20856  | -0,011 | 0,991618 |       |
| Witnessed      | 0,34661   | 0,478292 | 0,725  | 0,468646 |       |
| BLS_y_n        | 0,900405  | 0,690748 | 1,304  | 0,192397 |       |
| Epinephrine    | 0,2089    | 0,06044  | 3,456  | 0,000548 | ***   |
| Initial_Rhythm | 1,165994  | 0,221819 | 5,257  | 1,47E-07 | ***   |
| pH             | -0,775855 | 0,902559 | -0,86  | 0,39     |       |
| Lactate        | 0,09405   | 0,034047 | 2,762  | 0,005738 | **    |
| BE             | -0,034941 | 0,023413 | -1,492 | 0,135593 |       |

**IHCA, Model 2, mean**

| Coefficients:  | Estimate    | z        | value |
|----------------|-------------|----------|-------|
| (Intercept)    | 0,30320367  | 8,49E-01 |       |
| Age            | 0,02640683  | 1,01E-05 | ***   |
| Sex            | 0,0011885   | 9,63E-01 |       |
| Witnessed      | 0,298513    | 4,58E-01 |       |
| BLS_y_n        | 0,76194283  | 1,88E-01 |       |
| Epinephrine    | 0,179623    | 3,75E-04 | ***   |
| Initial_Rhythm | 0,98574433  | 2,33E-07 | ***   |
| pH             | -0,52529433 | 4,78E-01 |       |
| Lactate        | 0,07369883  | 9,36E-03 | **    |
| BE             | -0,035786   | 7,16E-02 |       |

**2**

| Coefficients:  | Estimate  | Std,     | Error  | z        | value |
|----------------|-----------|----------|--------|----------|-------|
| (Intercept)    | -0,810904 | 6,435035 | -0,126 | 0,899721 |       |
| Age            | 0,030784  | 0,007151 | 4,305  | 1,67E-05 | ***   |
| Sex            | 0,004827  | 0,208756 | 0,023  | 0,981552 |       |
| Witnessed      | 0,32304   | 0,481106 | 0,671  | 0,501932 |       |
| BLS_y_n        | 0,983466  | 0,702869 | 1,399  | 0,161748 |       |
| Epinephrine    | 0,219781  | 0,060161 | 3,653  | 0,000259 | ***   |
| Initial_Rhythm | 1,235538  | 0,222659 | 5,549  | 2,87E-08 | ***   |
| pH             | -0,467226 | 0,877236 | -0,533 | 0,594303 |       |
| Lactate        | 0,085716  | 0,033621 | 2,549  | 0,010789 | *     |
| BE             | -0,046932 | 0,023074 | -2,034 | 0,041952 | *     |

**3**

| <b>Coefficients:</b> | <b>Estimate</b> | <b>Std,</b> | <b>Error</b> | <b>z</b> | <b>value</b> |
|----------------------|-----------------|-------------|--------------|----------|--------------|
| (Intercept)          | 0,73017         | 6,399293    | 0,114        | 0,909157 |              |
| Age                  | 0,031024        | 0,007142    | 4,344        | 1,40E-05 | ***          |
| Sex                  | 0,020087        | 0,208564    | 0,096        | 0,923275 |              |
| Witnessed            | 0,455475        | 0,48797     | 0,933        | 0,350609 |              |
| BLS_y_n              | 0,872074        | 0,695739    | 1,253        | 0,210042 |              |
| Epinephrine          | 0,215633        | 0,059964    | 3,596        | 0,000323 | ***          |
| Initial_Rhythm       | 1,139979        | 0,22344     | 5,102        | 3,36E-07 | ***          |
| pH                   | -0,672499       | 0,872775    | -0,771       | 0,440985 |              |
| Lactate              | 0,088778        | 0,033996    | 2,611        | 0,009017 | **           |
| BE                   | -0,043221       | 0,023284    | -1,856       | 0,063419 |              |

**4**

| <b>Coefficients:</b> | <b>Estimate</b> | <b>Std,</b> | <b>Error</b> | <b>z</b> | <b>value</b> |
|----------------------|-----------------|-------------|--------------|----------|--------------|
| (Intercept)          | 1,80597         | 6,168646    | 0,293        | 0,769701 |              |
| Age                  | 0,031906        | 0,007139    | 4,469        | 7,85E-06 | ***          |
| Sex                  | 0,002678        | 0,208176    | 0,013        | 0,989735 |              |
| Witnessed            | 0,370808        | 0,476823    | 0,778        | 0,436767 |              |
| BLS_y_n              | 0,880048        | 0,687043    | 1,281        | 0,200221 |              |
| Epinephrine          | 0,218599        | 0,060474    | 3,615        | 0,000301 | ***          |
| Initial_Rhythm       | 1,119662        | 0,224714    | 4,983        | 6,27E-07 | ***          |
| pH                   | -0,827327       | 0,841853    | -0,983       | 0,325733 |              |
| Lactate              | 0,089114        | 0,033842    | 2,633        | 0,008457 | **           |
| BE                   | -0,040322       | 0,023183    | -1,739       | 0,081977 |              |



**5**

| <b>Coefficients:</b> | <b>Estimate</b> | <b>Std,</b> | <b>Error</b> | <b>z</b> | <b>value</b> |
|----------------------|-----------------|-------------|--------------|----------|--------------|
| (Intercept)          | -1,337608       | 6,442898    | -0,208       | 0,835534 |              |
| Age                  | 0,032365        | 0,007162    | 4,519        | 6,22E-06 | ***          |
| Sex                  | -0,01827        | 0,209196    | -0,087       | 0,930405 |              |
| Witnessed            | 0,295145        | 0,474483    | 0,622        | 0,533919 |              |
| BLS_y_n              | 0,935664        | 0,688156    | 1,36         | 0,173934 |              |
| Epinephrine          | 0,214825        | 0,061174    | 3,512        | 0,000445 | ***          |
| Initial_Rhythm       | 1,253293        | 0,225195    | 5,565        | 2,62E-08 | ***          |
| pH                   | -0,408859       | 0,87679     | -0,466       | 0,640991 |              |
| Lactate              | 0,084535        | 0,033957    | 2,489        | 0,012792 | *            |
| BE                   | -0,0493         | 0,023394    | -2,107       | 0,035081 | *            |

| OHCA, Model 1 |                |          |         |        |          |       |
|---------------|----------------|----------|---------|--------|----------|-------|
|               | Coefficients:  | Estimate | Std,    | Error  | z        | value |
| <b>1</b>      | (Intercept)    | -3,25934 | 0,23553 | 13,838 | 2,00E-16 | ***   |
|               | Age            | 0,02852  | 0,00345 | 8,267  | 2,00E-16 | ***   |
|               | Sex            | 0,17989  | 0,12216 | 1,473  | 0,140869 |       |
|               | Witnessed      | 0,56208  | 0,15836 | 3,549  | 0,000386 | ***   |
|               | BLS_y_n        | 0,76678  | 0,12872 | 5,957  | 2,57E-09 | ***   |
|               | Epinephrine    | 0,43411  | 0,02797 | 15,518 | 2,00E-16 | ***   |
|               | Initial_Rhythm | 1,46096  | 0,11286 | 12,945 | 2,00E-16 | ***   |

| OHCA, Model 1, mean |           |          |       |
|---------------------|-----------|----------|-------|
| Coefficient         | Estimate  | z        | value |
| (Intercept)         | -3,248252 | 2,00E-16 | ***   |
| Age                 | 0,0284072 | 2,40E-16 | ***   |
| Sex                 | 0,1805986 | 1,39E-01 |       |
| Witnessed           | 0,5670806 | 3,45E-04 | ***   |
| BLS_y_n             | 0,7701818 | 2,10E-09 | ***   |
| Epinephrine         | 0,435103  | 2,00E-16 | ***   |
| Initial_Rhythm      | 1,4336764 | 2,00E-16 | ***   |

|          | Coefficients:  | Estimate  | Std,     | Error  | z        | value |
|----------|----------------|-----------|----------|--------|----------|-------|
| <b>2</b> | (Intercept)    | -3,262161 | 0,235399 | 13,858 | 2,00E-16 | ***   |
|          | Age            | 0,028844  | 0,003447 | 8,369  | 2,00E-16 | ***   |
|          | Sex            | 0,182128  | 0,121774 | 1,496  | 0,134753 |       |
|          | Witnessed      | 0,583575  | 0,157995 | 3,694  | 0,000221 | ***   |
|          | BLS_y_n        | 0,763614  | 0,128388 | 5,948  | 2,72E-09 | ***   |
|          | Epinephrine    | 0,433195  | 0,027887 | 15,534 | 2,00E-16 | ***   |
|          | Initial_Rhythm | 1,420253  | 0,112594 | 12,614 | 2,00E-16 | ***   |

|          | Coefficients:  | Estimate  | Std,     | Error  | z        | value |
|----------|----------------|-----------|----------|--------|----------|-------|
| <b>3</b> | (Intercept)    | -3,250603 | 0,235193 | 13,821 | 2,00E-16 | ***   |
|          | Age            | 0,028389  | 0,003445 | 8,24   | 2,00E-16 | ***   |
|          | Sex            | 0,172159  | 0,12192  | 1,412  | 0,157932 |       |
|          | Witnessed      | 0,571058  | 0,158481 | 3,603  | 0,000314 | ***   |
|          | BLS_y_n        | 0,771998  | 0,128509 | 6,007  | 1,89E-09 | ***   |
|          | Epinephrine    | 0,436107  | 0,027977 | 15,588 | 2,00E-16 | ***   |
|          | Initial_Rhythm | 1,439857  | 0,112654 | 12,781 | 2,00E-16 | ***   |

**4**

| <b>Coefficients:</b> | <b>Estimate</b> | <b>Std,</b> | <b>Error</b> | <b>z</b> | <b>value</b> |
|----------------------|-----------------|-------------|--------------|----------|--------------|
| (Intercept)          | -3,238782       | 0,234628    | 13,804       | 2,00E-16 | ***          |
| Age                  | 0,028199        | 0,003436    | 8,208        | 2,25E-16 | ***          |
| Sex                  | 0,18798         | 0,121692    | 1,545        | 0,122414 |              |
| Witnessed            | 0,559759        | 0,158009    | 3,543        | 0,000396 | ***          |
| BLS_y_n              | 0,778717        | 0,128277    | 6,071        | 1,27E-09 | ***          |
| Epinephrine          | 0,437088        | 0,027962    | 15,631       | 2,00E-16 | ***          |
| Initial_Rhythm       | 1,413385        | 0,112184    | 12,599       | 2,00E-16 | ***          |

**5**

| <b>Coefficients:</b> | <b>Estimate</b> | <b>Std,</b> | <b>Error</b> | <b>z</b> | <b>value</b> |
|----------------------|-----------------|-------------|--------------|----------|--------------|
| (Intercept)          | -3,230374       | 0,23506     | 13,743       | 2,00E-16 | ***          |
| Age                  | 0,028084        | 0,003448    | 8,146        | 3,77E-16 | ***          |
| Sex                  | 0,180836        | 0,121937    | 1,483        | 0,138067 |              |
| Witnessed            | 0,558931        | 0,158106    | 3,535        | 0,000408 | ***          |
| BLS_y_n              | 0,7698          | 0,12845     | 5,993        | 2,06E-09 | ***          |
| Epinephrine          | 0,435015        | 0,027972    | 15,552       | 2,00E-16 | ***          |
| Initial_Rhythm       | 1,433927        | 0,112409    | 12,756       | 2,00E-16 | ***          |

**OHCA, Model 2**
**1**

| Coefficients:  | Estimate  | Std,     | Error  | z        | value |
|----------------|-----------|----------|--------|----------|-------|
| (Intercept)    | -5,503962 | 4,315838 | -1,275 | 0,202205 |       |
| Age            | 0,03366   | 0,003653 | 9,215  | 2,00E-16 | ***   |
| Sex            | 0,191594  | 0,125698 | 1,524  | 0,127446 |       |
| Witnessed      | 0,521766  | 0,161691 | 3,227  | 0,001251 | **    |
| BLS_y_n        | 0,761317  | 0,131182 | 5,804  | 6,49E-09 | ***   |
| Epinephrine    | 0,322622  | 0,029478 | 10,945 | 2,00E-16 | ***   |
| Initial_Rhythm | 1,181908  | 0,118701 | 9,957  | 2,00E-16 | ***   |
| pH             | 0,175882  | 0,585546 | 0,3    | 0,763892 |       |
| Lactate        | 0,084105  | 0,022258 | 3,779  | 0,000158 | ***   |
| BE             | -0,03794  | 0,01721  | -2,205 | 0,027488 | *     |

**OHCA, Model 2 mean**

| Coefficients:  | Estimate   | z        | value |
|----------------|------------|----------|-------|
| (Intercept)    | -5,275805  | 2,22E-01 |       |
| Age            | 0,0335686  | 2,00E-16 | ***   |
| Sex            | 0,1798832  | 1,54E-01 |       |
| Witnessed      | 0,5161356  | 1,45E-03 | **    |
| BLS_y_n        | 0,7634572  | 6,19E-09 | ***   |
| Epinephrine    | 0,3264038  | 2,00E-16 | ***   |
| Initial_Rhythm | 1,2175584  | 2,00E-16 | ***   |
| pH             | 0,146535   | 8,03E-01 |       |
| Lactate        | 0,0849706  | 1,45E-04 | ***   |
| BE             | -0,0338138 | 5,43E-02 |       |

**2**

| Coefficients:  | Estimate  | Std,     | Error  | z        | value |
|----------------|-----------|----------|--------|----------|-------|
| (Intercept)    | -5,434451 | 4,359792 | -1,246 | 0,212583 |       |
| Age            | 0,032856  | 0,003632 | 9,047  | 2,00E-16 | ***   |
| Sex            | 0,171733  | 0,126074 | 1,362  | 0,173149 |       |
| Witnessed      | 0,503512  | 0,161676 | 3,114  | 0,001844 | **    |
| BLS_y_n        | 0,769428  | 0,131074 | 5,87   | 4,35E-09 | ***   |
| Epinephrine    | 0,328206  | 0,029569 | 11,1   | 2,00E-16 | ***   |
| Initial_Rhythm | 1,207661  | 0,118804 | 10,165 | 2,00E-16 | ***   |
| pH             | 0,175306  | 0,590868 | 0,297  | 0,766701 |       |
| Lactate        | 0,083468  | 0,022023 | 3,79   | 0,000151 | ***   |
| BE             | -0,034355 | 0,017368 | -1,978 | 0,047919 | *     |

### 3

| <b>Coefficients:</b> | <b>Estimate</b> | <b>Std,</b> | <b>Error</b> | <b>z</b> | <b>value</b> |
|----------------------|-----------------|-------------|--------------|----------|--------------|
| (Intercept)          | -4,779305       | 4,335211    | -1,102       | 0,27027  |              |
| Age                  | 0,034147        | 0,003652    | 9,349        | 2,00E-16 | ***          |
| Sex                  | 0,180091        | 0,126319    | 1,426        | 0,15396  |              |
| Witnessed            | 0,501477        | 0,161747    | 3,1          | 0,00193  | **           |
| BLS_y_n              | 0,760387        | 0,131635    | 5,776        | 7,63E-09 | ***          |
| Epinephrine          | 0,328062        | 0,029364    | 11,172       | 2,00E-16 | ***          |
| Initial_Rhythm       | 1,251452        | 0,119545    | 10,468       | 2,00E-16 | ***          |
| pH                   | 0,073013        | 0,588022    | 0,124        | 0,90118  |              |
| Lactate              | 0,091123        | 0,02241     | 4,066        | 4,78E-05 | ***          |
| BE                   | -0,027228       | 0,017202    | -1,583       | 0,11345  |              |

### 4

| <b>Coefficients:</b> | <b>Estimate</b> | <b>Std,</b> | <b>Error</b> | <b>z</b> | <b>value</b> |
|----------------------|-----------------|-------------|--------------|----------|--------------|
| (Intercept)          | -5,39849        | 4,312869    | -1,252       | 0,210673 |              |
| Age                  | 0,033938        | 0,003655    | 9,285        | 2,00E-16 | ***          |
| Sex                  | 0,183731        | 0,125867    | 1,46         | 0,144367 |              |
| Witnessed            | 0,524753        | 0,161866    | 3,242        | 0,001187 | **           |
| BLS_y_n              | 0,759733        | 0,131461    | 5,779        | 7,51E-09 | ***          |
| Epinephrine          | 0,323343        | 0,029485    | 10,966       | 2,00E-16 | ***          |
| Initial_Rhythm       | 1,237249        | 0,119067    | 10,391       | 2,00E-16 | ***          |
| pH                   | 0,159377        | 0,584947    | 0,272        | 0,785266 |              |
| Lactate              | 0,084215        | 0,022275    | 3,781        | 0,000156 | ***          |
| BE                   | -0,035512       | 0,017309    | -2,052       | 0,040198 | *            |

| <b>Coefficients:</b> | <b>Estimate</b> | <b>Std,</b> | <b>Error</b> | <b>z</b> | <b>value</b> |
|----------------------|-----------------|-------------|--------------|----------|--------------|
| (Intercept)          | -5,262817       | 4,238983    | -1,242       | 0,21441  |              |

# 5

|                |           |          |        |          |     |
|----------------|-----------|----------|--------|----------|-----|
| Age            | 0,033242  | 0,003641 | 9,129  | 2,00E-16 | *** |
| Sex            | 0,172267  | 0,125781 | 1,37   | 0,17082  |     |
| Witnessed      | 0,52917   | 0,161441 | 3,278  | 0,00105  | **  |
| BLS_y_n        | 0,766421  | 0,131053 | 5,848  | 4,97E-09 | *** |
| Epinephrine    | 0,329786  | 0,029612 | 11,137 | 2,00E-16 | *** |
| Initial_Rhythm | 1,209522  | 0,118986 | 10,165 | 2,00E-16 | *** |
| pH             | 0,149097  | 0,575262 | 0,259  | 0,7955   |     |
| Lactate        | 0,081942  | 0,022104 | 3,707  | 0,00021  | *** |
| BE             | -0,034034 | 0,016784 | -2,028 | 0,04258  | *   |

**Multiple Imputations, AUC**

| Imputation     | IHCA, Model 1 |               | IHCA, Model 2 |               | Diff AUC | p-value   |
|----------------|---------------|---------------|---------------|---------------|----------|-----------|
|                | AUC           | CI 99%        | AUC           | CI 99%        |          |           |
| LogReg 1       | 0,778         | 0,7293-0,8266 | 0,815         | 0,7696-0,8595 | 0,037    | < 0.001 * |
| LogReg 2       | 0,78          | 0,7316-0,8286 | 0,816         | 0,7717-0,8613 | 0,036    | < 0.001 * |
| LogReg 3       | 0,779         | 0,7307-0,8279 | 0,815         | 0,7704-0,8602 | 0,036    | < 0.001 * |
| LogReg 4       | 0,782         | 0,7338-0,8304 | 0,815         | 0,7694-0,8596 | 0,033    | < 0.001 * |
| LogReg 5       | 0,778         | 0,7289-0,8264 | 0,817         | 0,7724-0,862  | 0,039    | < 0.001 * |
| <b>Average</b> | 0,7794        |               | 0,8156        |               | 0,0362   | < 0.001 * |

**Bonferroni correction:**

p = 0.01 -> p\_corr = 0.002

\* significant after Bonferroni correction

| Imputation     | OHCA, Model 1 |               | OHCA, Model 2 |               | Diff AUC | p-value |
|----------------|---------------|---------------|---------------|---------------|----------|---------|
|                | AUC           | CI 99%        | AUC           | CI 99%        |          |         |
| LogReg 1       | 0,836         | 0,8136-0,8586 | 0,845         | 0,8228-0,8663 | 0,009    | 0,003   |
| LogReg 2       | 0,834         | 0,8117-0,857  | 0,844         | 0,8223-0,8659 | 0,01     | 0,002 * |
| LogReg 3       | 0,835         | 0,8126-0,8577 | 0,846         | 0,8247-0,868  | 0,011    | 0,001 * |
| LogReg 4       | 0,834         | 0,8116-0,8569 | 0,846         | 0,8242-0,8675 | 0,012    | 0,0025  |
| LogReg 5       | 0,835         | 0,8122-0,8575 | 0,844         | 0,8219-0,8655 | 0,009    | 0,007   |
| <b>Average</b> | 0,835         |               | 0,845         |               | 0,010    | 0,003   |

IHCA LogReg 1

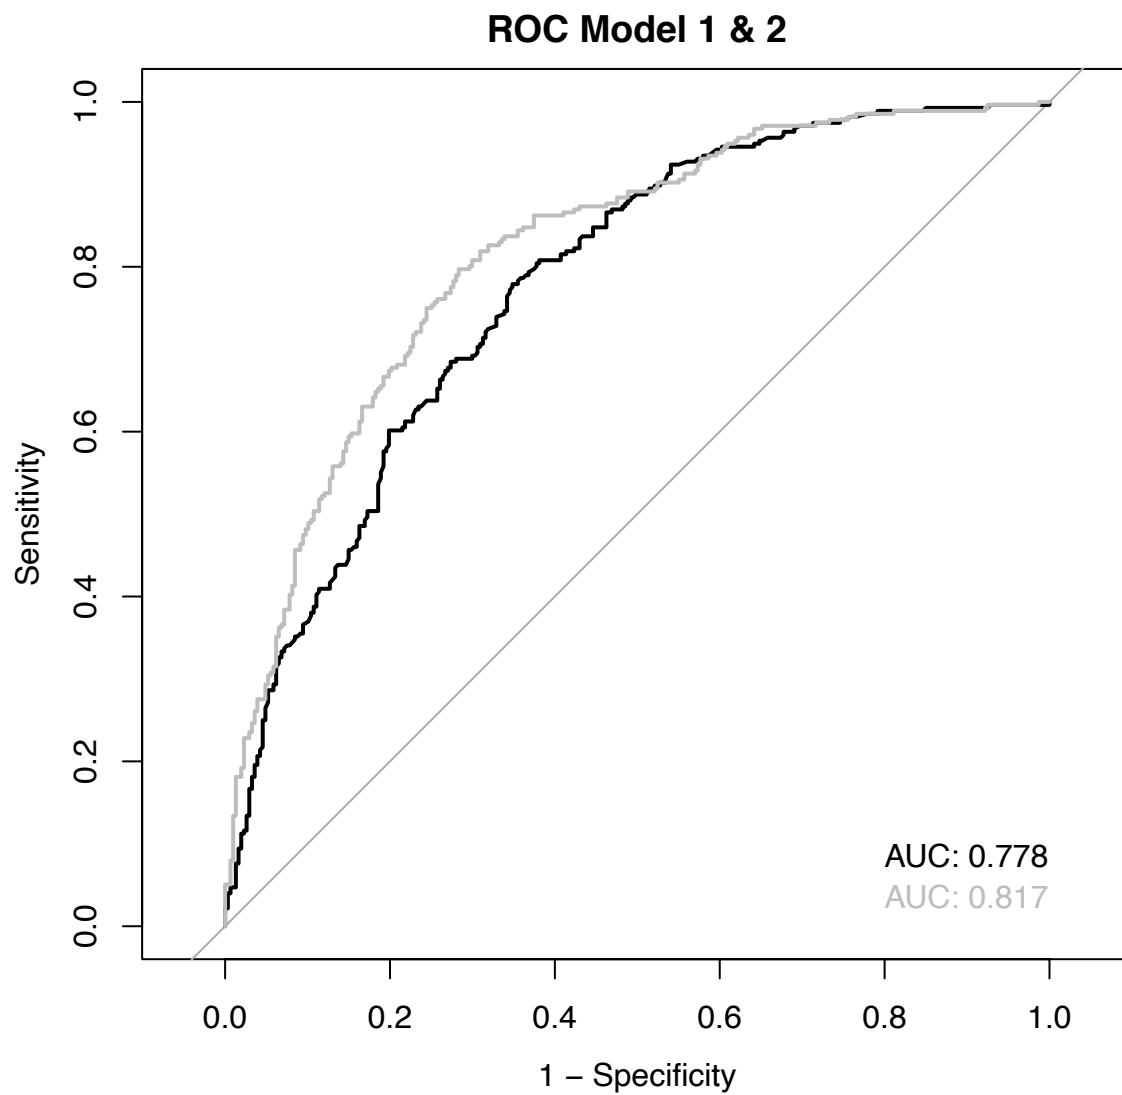



IHCA LogReg 2

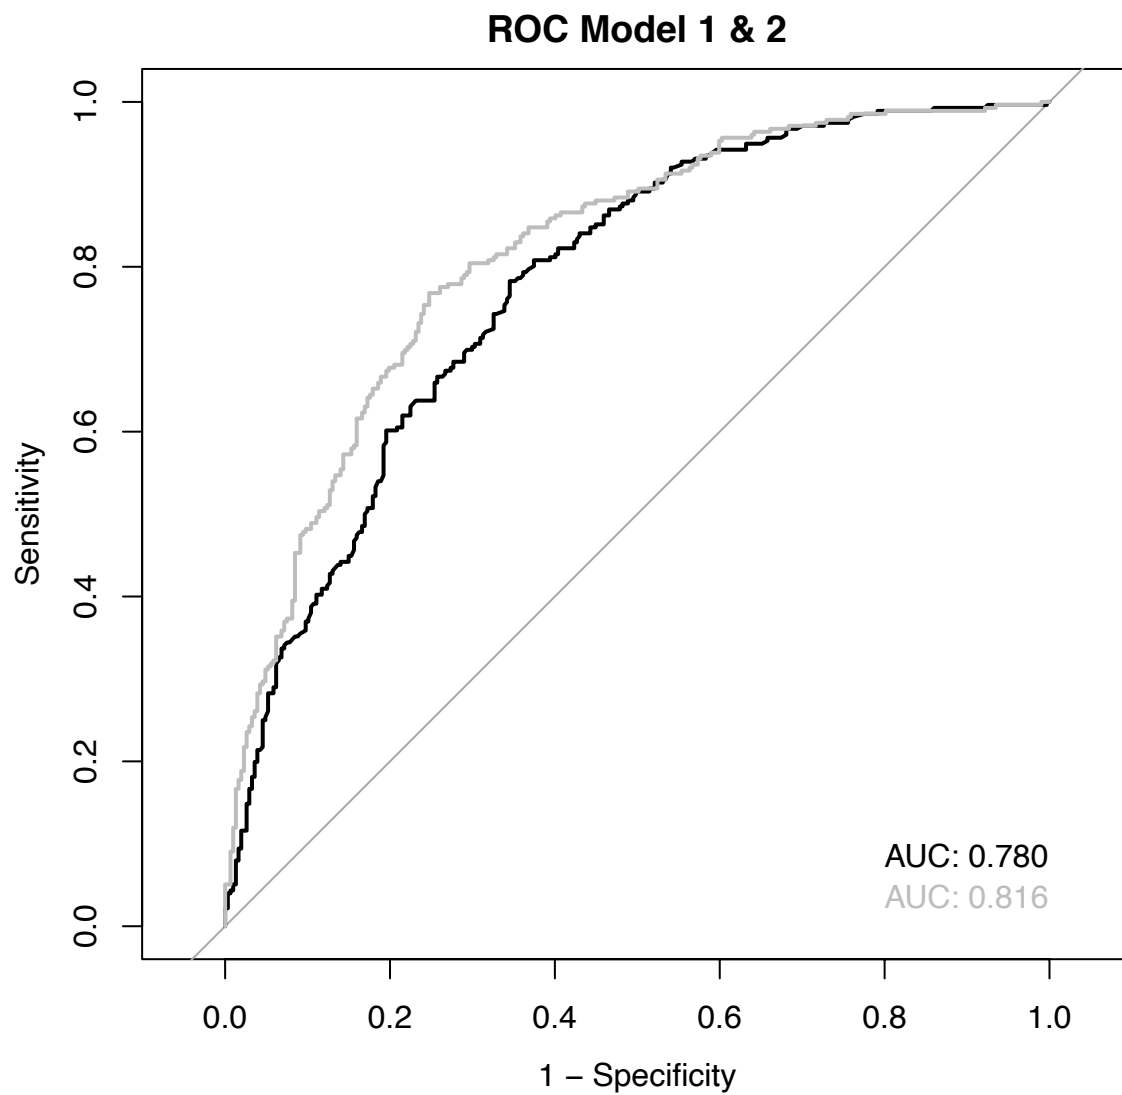

IHCA LogReg 3

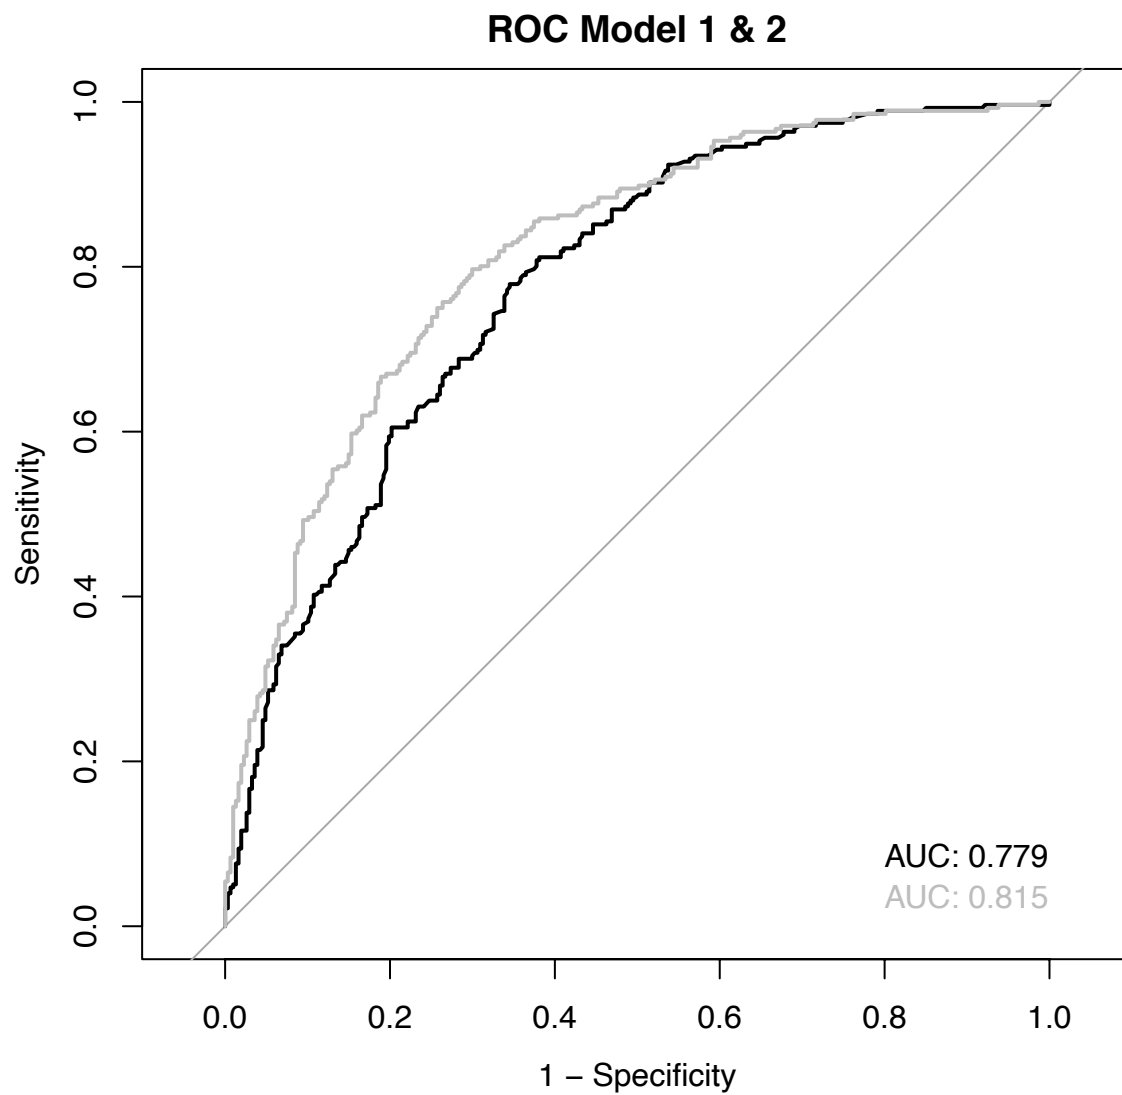

IHCA LogReg 4

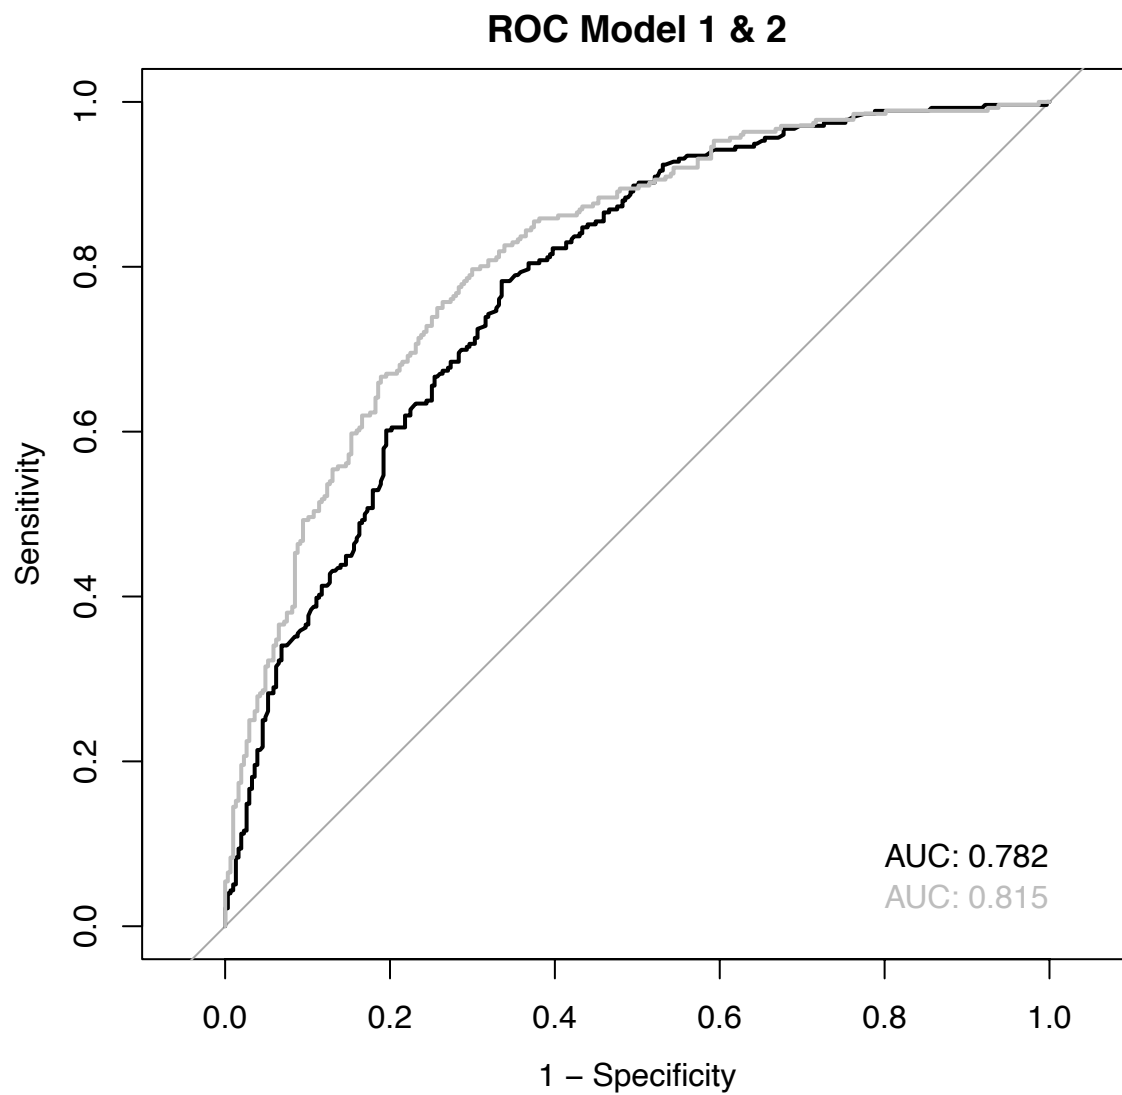

IHCA LogReg 5

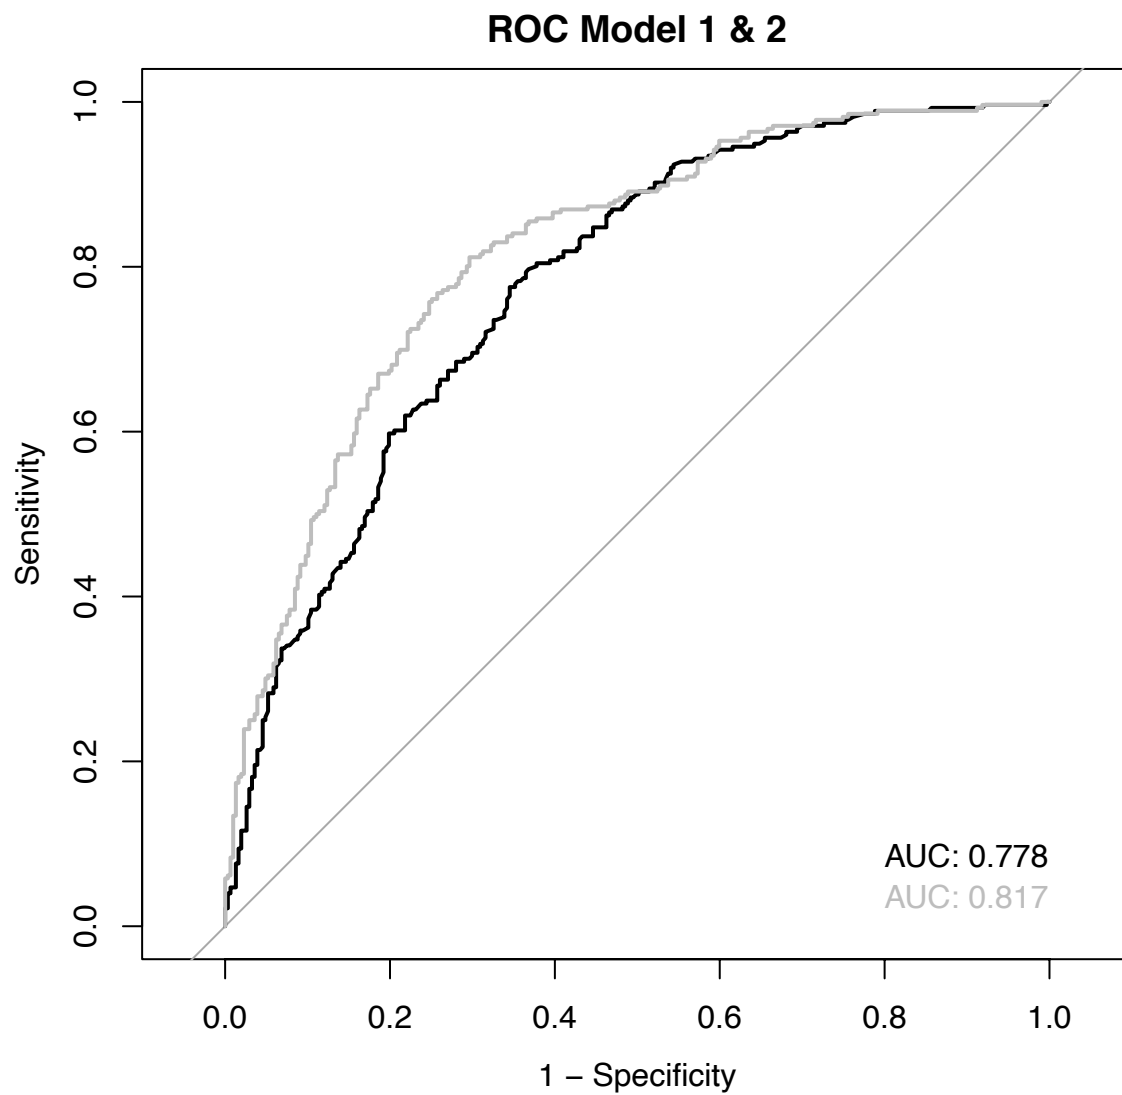

OHCA LogReg 1

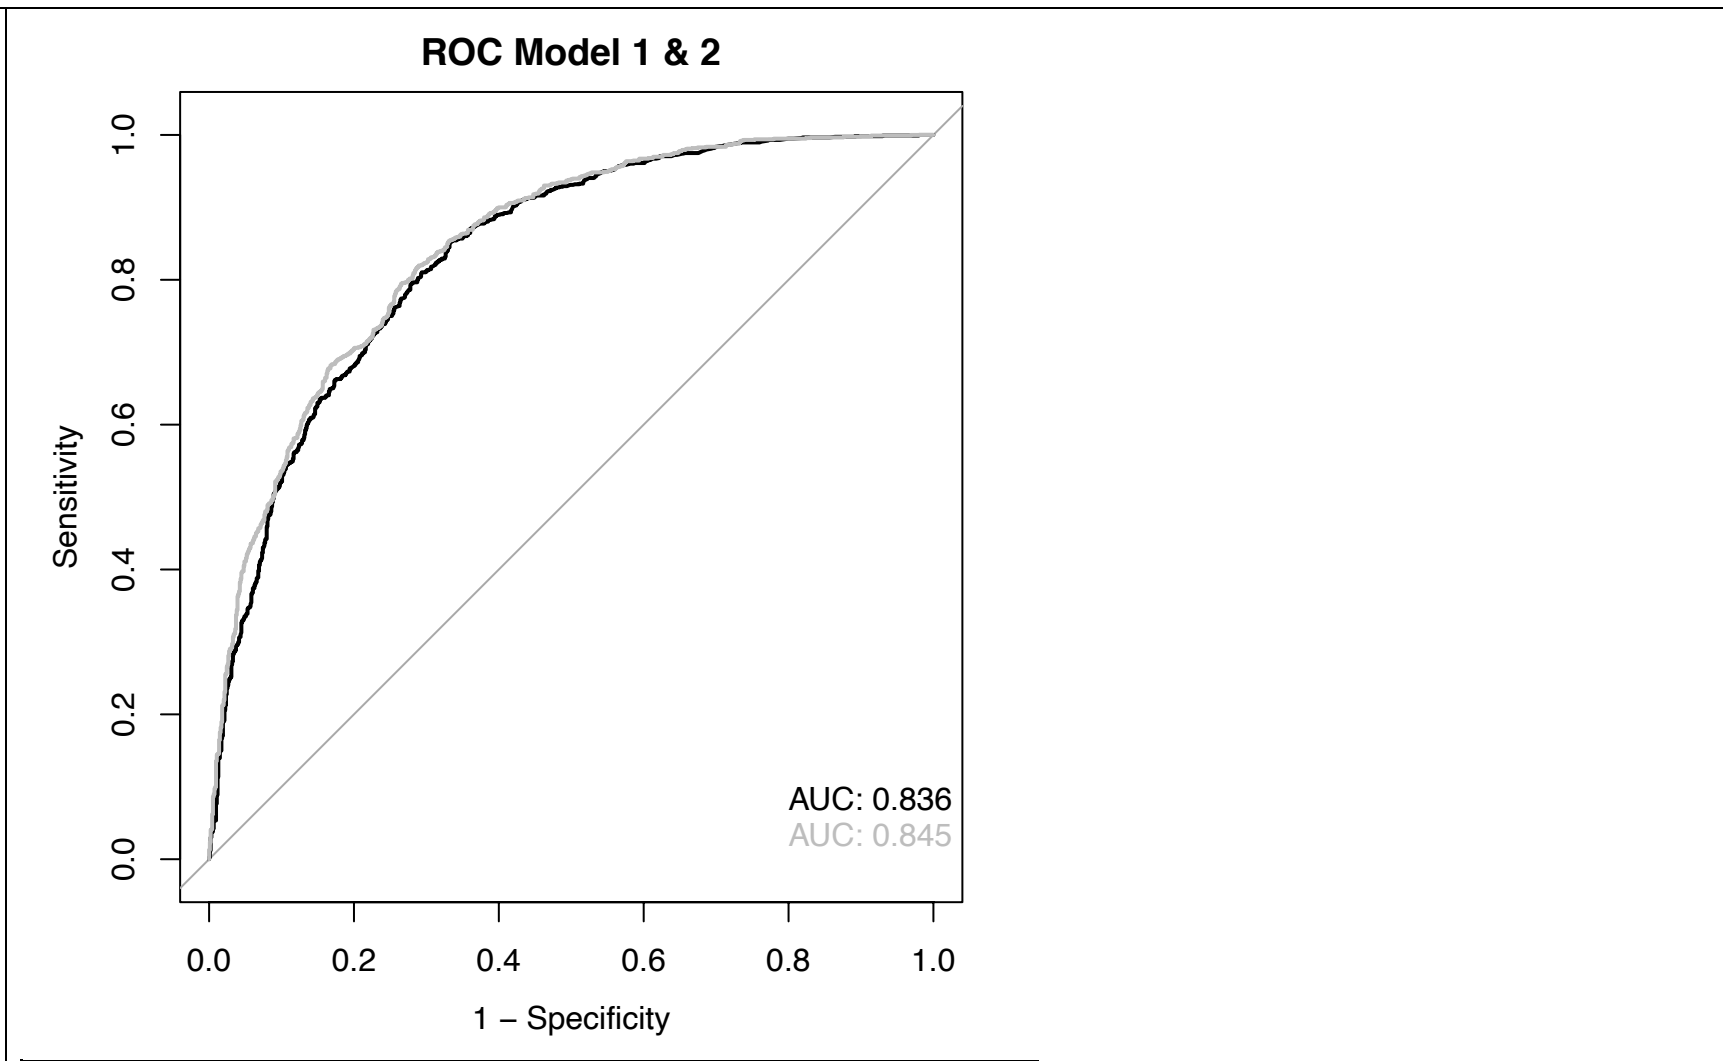

OHCA LogReg 2

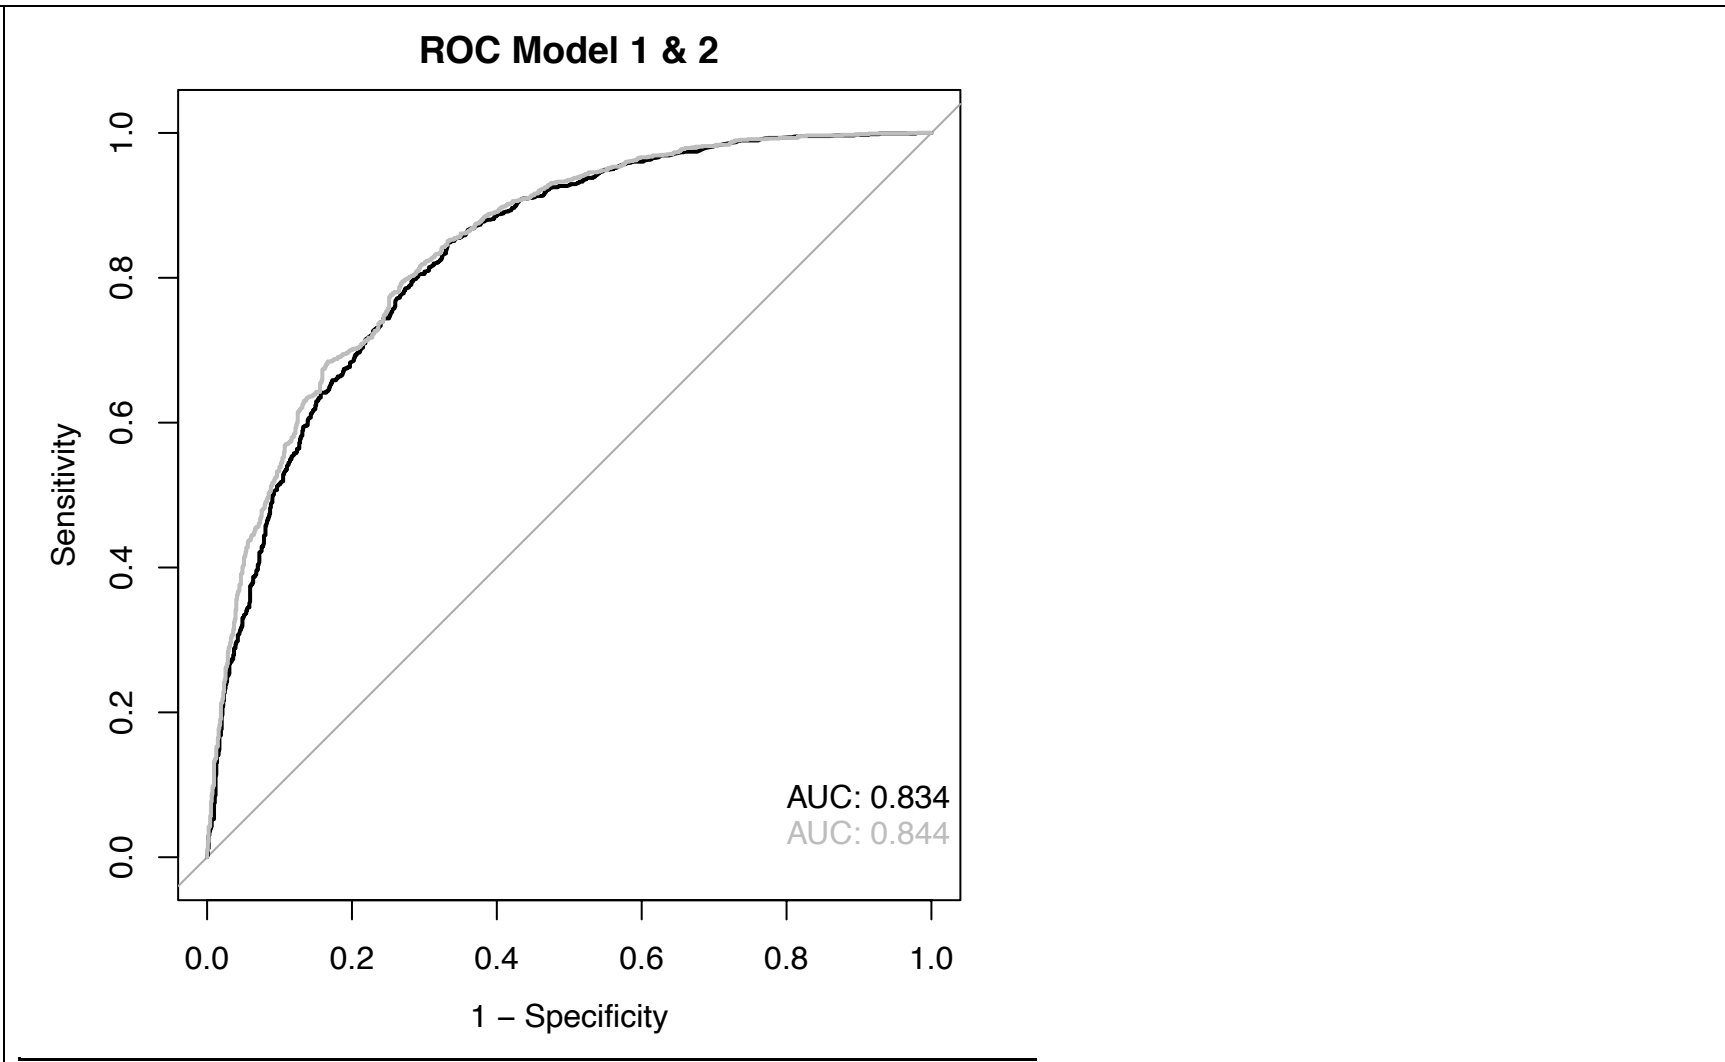

**OHCA LogReg 3**

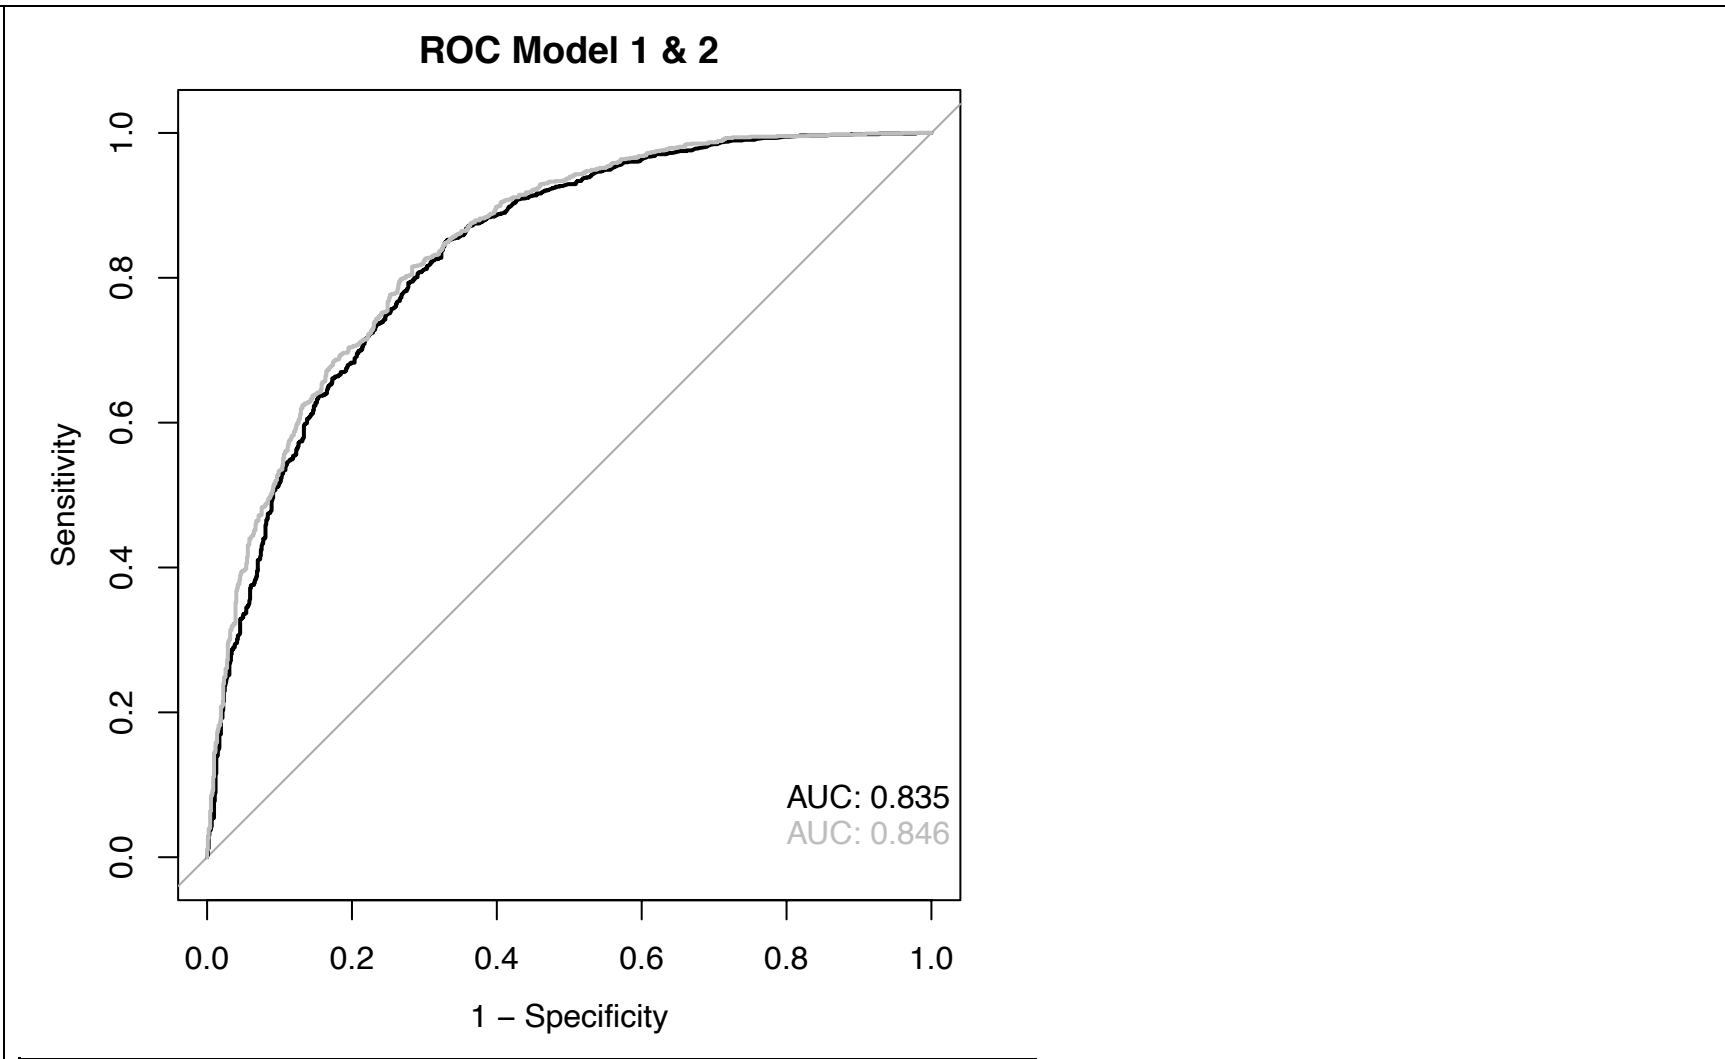

**OHCA LogReg 4**

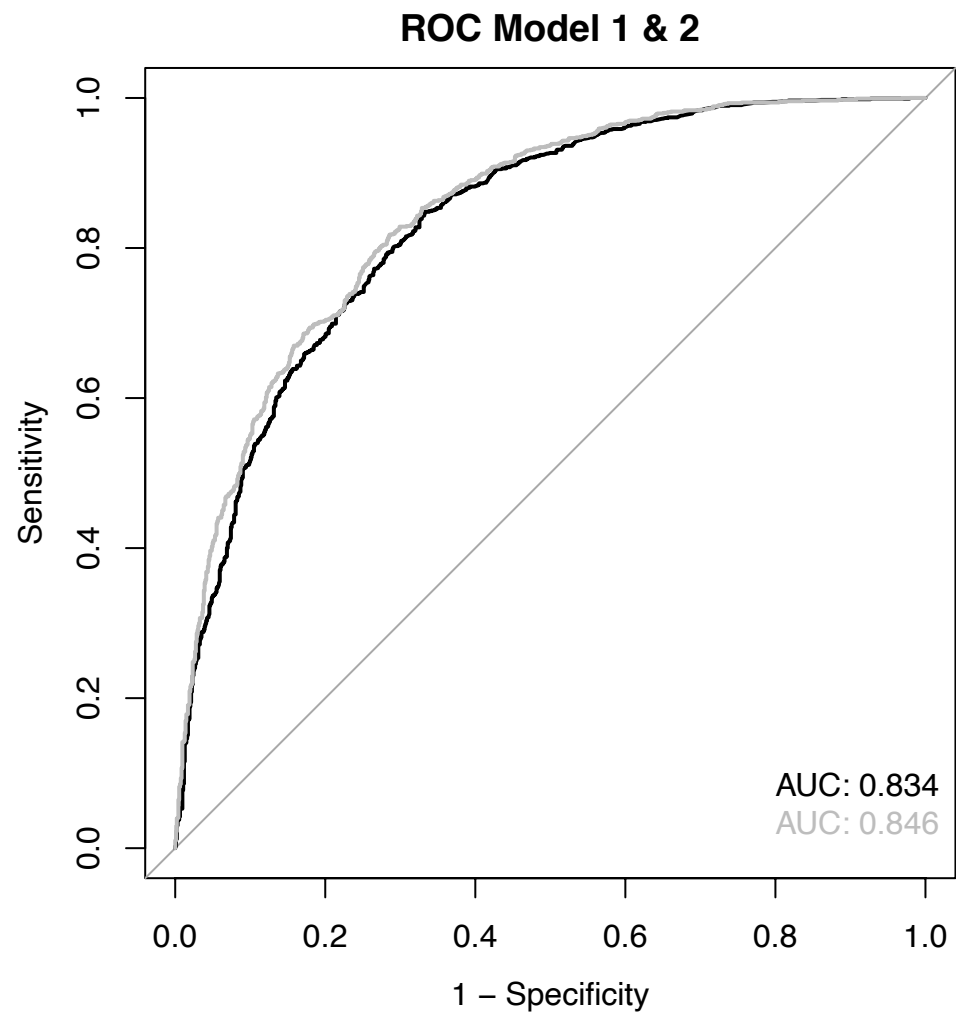



OHCA LogReg 5

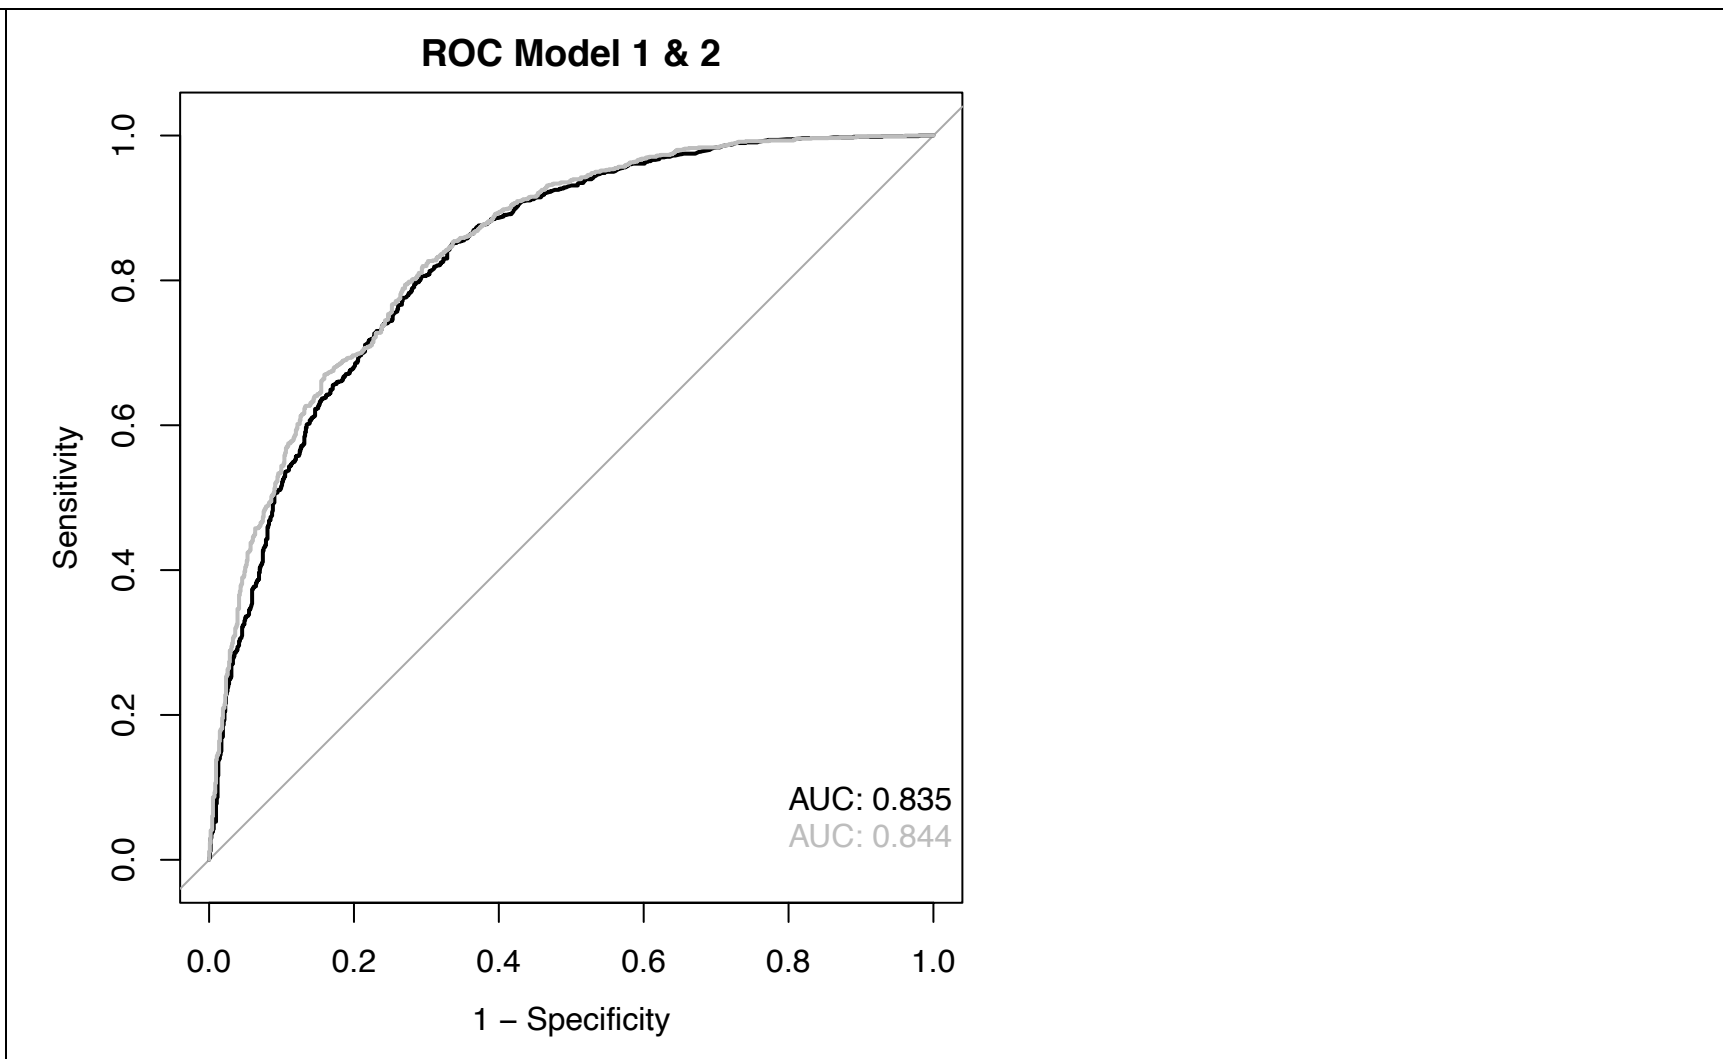

Supplement: Data_Sheet_1.pdf [file Data_Sheet_1.pdf]
